# Supplementary material
Source: PubMed Central journal article supplement (PMC6995281)
Supplement: NIHMS1069025-supplement-1.pdf [file NIHMS1069025-supplement-1.pdf]

**Supplementary Table 1** Age-adjusted and multivariable-adjusted relative hazards of clinical outcomes in all breast cancer (n=2,555) and ER+ breast cancer (n=2,025) according to Ki67 score, Nurses' Health Study, 1976-2006

| All breast cancer       | Distant recurrence         |                  |                      | Breast cancer-specific mortality |                  |                      | Overall mortality          |                  |                      |
|-------------------------|----------------------------|------------------|----------------------|----------------------------------|------------------|----------------------|----------------------------|------------------|----------------------|
|                         | Person-years               | Recurrences      |                      | Person-years                     | Deaths           |                      | Person-years               | Deaths           |                      |
|                         | 41,598                     | 623              |                      | 40,009                           | 586              |                      | 40,009                     | 1110             |                      |
|                         | Model                      | HR               | p-value <sup>a</sup> | Model                            | HR               | p-value <sup>a</sup> | Model                      | HR               | p-value <sup>a</sup> |
| Ki67 score <sup>c</sup> | Age-adjusted               | 1.44 (0.84-2.47) | 0.19                 | Age-adjusted                     | 2.00 (1.17-3.41) | 0.01                 | Age-adjusted               | 1.32 (0.86-2.01) | 0.20                 |
|                         | Multivariable <sup>b</sup> | 1.23 (0.69-2.20) | 0.49                 | Multivariable <sup>b</sup>       | 1.78 (0.99-3.18) | 0.05                 | Multivariable <sup>b</sup> | 1.40 (0.89-2.20) | 0.15                 |
|                         | MV + grade                 | 1.10 (0.61-1.99) | 0.75                 | MV + grade                       | 1.51 (0.83-2.74) | 0.17                 | MV + grade                 | 1.28 (0.81-2.02) | 0.30                 |
| Ki67 ≥ 14%              | Age-adjusted               | 1.22 (1.02-1.45) | 0.03                 | Age-adjusted                     | 1.38 (1.15-1.65) | 0.0004               | Age-adjusted               | 1.14 (1.00-1.31) | 0.06                 |
|                         | Multivariable <sup>b</sup> | 1.14 (0.95-1.37) | 0.16                 | Multivariable <sup>b</sup>       | 1.33 (1.10-1.61) | 0.003                | Multivariable <sup>b</sup> | 1.15 (1.00-1.32) | 0.05                 |
|                         | MV + grade                 | 1.10 (0.91-1.32) | 0.32                 | MV + grade                       | 1.26 (1.04-1.52) | 0.02                 | MV + grade                 | 1.12 (0.97-1.29) | 0.13                 |
| ER+ breast cancer       | Person-years               | Recurrences      |                      | Person-years                     | Deaths           |                      | Person-years               | Deaths           |                      |
|                         | 32,182                     | 438              |                      | 30,964                           | 409              |                      | 30,964                     | 829              |                      |
|                         | Model                      | HR               | p-value <sup>a</sup> | Model                            | HR               | p-value <sup>a</sup> | Model                      | HR               | p-value <sup>a</sup> |
| Ki67 score              | Age-adjusted               | 1.87 (0.88-3.93) | 0.10                 | Age-adjusted                     | 2.93 (1.43-6.01) | 0.003                | Age-adjusted               | 1.65 (0.94-2.90) | 0.08                 |
|                         | Multivariable <sup>b</sup> | 1.66 (0.74-3.74) | 0.22                 | Multivariable <sup>b</sup>       | 2.94 (1.32-6.54) | 0.008                | Multivariable <sup>b</sup> | 1.70 (0.93-3.09) | 0.08                 |
|                         | MV + grade                 | 1.56 (0.69-3.56) | 0.29                 | MV + grade                       | 2.75 (1.22-6.21) | 0.02                 | MV + grade                 | 1.63 (0.89-2.99) | 0.11                 |
| Ki67 ≥ 14%              | Age-adjusted               | 1.23 (0.98-1.54) | 0.07                 | Age-adjusted                     | 1.43 (1.13-1.80) | 0.002                | Age-adjusted               | 1.16 (0.98-1.38) | 0.08                 |
|                         | Multivariable <sup>b</sup> | 1.13 (0.90-1.44) | 0.29                 | Multivariable <sup>b</sup>       | 1.36 (1.07-1.73) | 0.01                 | Multivariable <sup>b</sup> | 1.14 (0.96-1.36) | 0.14                 |
|                         | MV + grade                 | 1.10 (0.87-1.39) | 0.44                 | MV + grade                       | 1.29 (1.02-1.65) | 0.04                 | MV + grade                 | 1.12 (0.94-1.33) | 0.21                 |

HR hazard ratio

<sup>a</sup>  $\chi^2$  tests

<sup>b</sup> Adjusted for age and breast cancer prognostic factors including menopausal status and MH use (premenopausal, never user, past user, current estrogen user, current estrogen and progesterone user, current other user, unknown status), BMI (<20, 20-21.9, 22-23.9, 24-26.9, 27+ kg/m<sup>2</sup>), smoking status (never, current and past smoker) weight change at least 12 months after diagnosis (>10% loss, 5-10% loss, <5% loss to <5% gain, 5-10% gain, >10% gain), physical activity at least 24 months after diagnosis (<3, 3-8.9, 9-14.9, 15-23.9, 24+ metabolic equivalents/week), stages I-III, chemotherapy (yes/no), radiation therapy (yes/no), tamoxifen use (yes/no), other hormone therapy (yes/no), date of diagnosis and time since diagnosis.

<sup>c</sup> Ki67 score is a continuous score representing the percentage of Ki67 positive nuclei detected by Definiens (0-100%)
